# Supplementary material for: The effects of Y chromosome microdeletions on in vitro fertilization outcomes, health abnormalities in offspring and recurrent pregnancy loss
Source: PubMed Central journal article supplement — Transl Androl Urol. 2021 Mar;10(3):1457–66. doi: 10.21037/tau-19-672 (PMC8039589; doi:10.21037/tau-19-672), 2021-03
Supplement: tau-10-03-1457-supplementary.pdf [file tau-10-03-1457-supplementary.pdf]

ICSI results, FR and clinical pregnancy rate amongst men with and without Y chromosome deletions

| Study                            | Year | YCM                                            | N subjects<br>(MOLGY <sup>†</sup> , SOLGY <sup>‡</sup> ,<br>AZOY <sup>§</sup> , OATY <sup>¶</sup> ,<br>SOLG <sup>††</sup> , AZO <sup>‡‡</sup> ,<br>OAT <sup>§§</sup> ) | Sperm<br>retrieval (%)                                           | Metaphase<br>II oocytes | FR <sup>¶¶</sup> | Embryo<br>transfers | Cleaved<br>embryo<br>rate <sup>†††</sup> | Clinical pregnancy rate <sup>†††</sup>                                                                    | Live birth<br>rate/ET | Birth defect<br>rate/ET | Note                                                                  |
|----------------------------------|------|------------------------------------------------|------------------------------------------------------------------------------------------------------------------------------------------------------------------------|------------------------------------------------------------------|-------------------------|------------------|---------------------|------------------------------------------|-----------------------------------------------------------------------------------------------------------|-----------------------|-------------------------|-----------------------------------------------------------------------|
| Silber <i>et al.</i> (12)        | 1998 | ΔAZFc                                          | 10 AZOY; 4 SOLGY                                                                                                                                                       | 5/10 [50]<br>TESE AZOY;<br>6/6 [100] <sup>‡</sup><br>ejaculation | 157                     | 89/157<br>[57]   | N/A                 | 55/89 [62]                               | 5/16 [31] couples ongoing or<br>delivered pregnancy; 42%<br>clinical pregnancy rate/ET<br>(for Y-deleted) | N/A                   | N/A                     | Total of 14 patients,<br>but 2 patients went<br>through 2 cycles each |
|                                  |      | ΔAZFc (6D–<br>6F) and<br>beyond                | 5 AZOY                                                                                                                                                                 | 0/5 [0] TESE                                                     | N/A                     | N/A              | N/A                 | N/A                                      | N/A                                                                                                       | N/A                   | N/A                     | –                                                                     |
|                                  |      | –                                              | 41 AZO                                                                                                                                                                 | 22/41 [54]<br>TESE                                               | 290                     | 123/290<br>[42]  | N/A                 | 76/123 [62]                              | 12/41 [29] couples ongoing<br>or delivered pregnancy;<br>50% clinical pregnancy<br>rate/ET (for Y-intact) | N/A                   | N/A                     | –                                                                     |
|                                  |      | –                                              | 26 SOLG                                                                                                                                                                | 26/26 [100]<br>ejaculate                                         | 312                     | 200/312<br>[64]  | N/A                 | 113/200 [56]                             | 12/26 [46] couples ongoing<br>or delivered pregnancy;<br>50% clinical pregnancy<br>rate/ET (for Y-intact) | N/A                   | N/A                     | –                                                                     |
| Rossato<br><i>et al.</i><br>(13) | 1998 | Complete<br>ΔAZFa; partial<br>ΔAZFb<br>(except | 1 SOLGY (3.7×10 <sup>6</sup><br>and 5.3×10 <sup>6</sup><br>cells/mL)                                                                                                   | 1/1 [100]<br>ejaculate                                           | 8                       | 5/8 [63]         | 4                   | 4/5 [80]                                 | 0/4 [0]                                                                                                   | N/A                   | N/A                     | –                                                                     |

|                              |      |                                                          |                            |                                                                                                                       |                                                                                                   |                                                            |                                    |           |                                                           |                               |                                                                                               |                                                                                              |
|------------------------------|------|----------------------------------------------------------|----------------------------|-----------------------------------------------------------------------------------------------------------------------|---------------------------------------------------------------------------------------------------|------------------------------------------------------------|------------------------------------|-----------|-----------------------------------------------------------|-------------------------------|-----------------------------------------------------------------------------------------------|----------------------------------------------------------------------------------------------|
|                              |      | RBM1, RBM2); partial $\Delta$ AZFc (only sY146, sY149)   |                            |                                                                                                                       |                                                                                                   |                                                            |                                    |           |                                                           |                               |                                                                                               |                                                                                              |
| Kleiman <i>et al.</i> (14)   | 1999 | $\Delta$ AZFc                                            | 1 AZOY                     | 2/2 [100] multiple-sample TESE (three ICSI attempts; collected sperm twice)                                           | Cycle 1: 4; cycle 2: 9; cycle 3: 8                                                                | Cycle 1*: 3/4 [75]; cycle 2*: 2/9 [22]; cycle 3*: 6/8 [75] | Cycle 1: 3; cycle 2: 2; cycle 3: 6 | N/A       | 3/11 [27], *triplet pregnancy                             | 3/11 [27], *triplet pregnancy | -                                                                                             | -                                                                                            |
| Page <i>et al.</i> (15)      | 1999 | $\Delta$ AZFc (sY205, sY254, sY624, sY602, sY202, sY158) | 2 cryptozoospermic; 1 AZOY | Originally, 0/3 [0] ejaculate; after semen centrifugation and extensive searching, 2/3 [67] ejaculate; 1/1 [100] TESE | $\geq 71$ (number of oocytes retrieved not specified for man #3, only number of oocytes injected) | 29/59 [59]                                                 | 24                                 | N/A       | 5/24 [21]; two pregnancies were twins, last was singleton | 4/24 [17]                     | 1 Pulmonary atresia and right ventricular hypoplasia; 1 gastric reflux (resolved at 3 months) | One fetus died shortly after birth due to pulmonary atresia and right ventricular hypoplasia |
| Chang <i>et al.</i> (16)     | 1999 | $\Delta$ AZFc                                            | 1 AZOY                     | 1/1 [100] ejaculate                                                                                                   | 9                                                                                                 | 3/9 [33]                                                   | 3                                  | 3/3 [100] | N/A                                                       | 1/3 [33]                      | N/A                                                                                           | -                                                                                            |
| van Golde <i>et al.</i> (17) | 2001 | $\Delta$ AZFc                                            | 8 SOLGY                    | 7/8 [88] ejaculate                                                                                                    | 8.1 $\pm$ 4 oocytes/oocyte retrieval (mean $\pm$ SD)                                              | 55 $\pm$ 7 [41, 69] (mean $\pm$ SEM)                       | 17                                 | N/A       | 3/17 [18]                                                 | 3/17 [18]                     | N/A                                                                                           | -                                                                                            |
|                              |      | -                                                        | 107 SOLG                   | -                                                                                                                     | 9.6 $\pm$ 4.9 oocytes/ooc                                                                         | 70 $\pm$ 2 [67, 74]                                        | 230                                | N/A       | 73/230 [32]                                               | 60/230 [26] <sup>p</sup>      | N/A                                                                                           | -                                                                                            |



|                         |         |                                      |                         |                                                               |                         |                |                                              |                                  |          |          |     |                                                                                 |                 |    |     |           |           |     |   |
|-------------------------|---------|--------------------------------------|-------------------------|---------------------------------------------------------------|-------------------------|----------------|----------------------------------------------|----------------------------------|----------|----------|-----|---------------------------------------------------------------------------------|-----------------|----|-----|-----------|-----------|-----|---|
|                         |         | ΔAZFc<br>(ΔsY202,<br>ΔsY243)         | 2 AZOY                  | 0/2 [0] TESE                                                  | N/A                     | N/A            | N/A                                          | N/A                              | N/A      | N/A      | N/A | -                                                                               |                 |    |     |           |           |     |   |
|                         |         | ΔAZFc (except<br>sY158 and<br>sY159) | 2 AZOY                  | 2/2 [100]<br>TESE; [only<br>one patient<br>attempted<br>ICSI] | 20                      | 6/20 [30]      | 5 mixed<br>embryos<br>and<br>blastocys<br>ts | Cycle 1:<br>60%, cycle<br>2: 75% | 0/5 [0]  | N/A      | N/A | -                                                                               |                 |    |     |           |           |     |   |
| Choi <i>et al.</i> (21) | 2004    | ΔAZFa                                | 1 AZOY                  | 0/1 [0] TESE                                                  | 102 injected<br>oocytes | 42/102<br>[41] | 7                                            | N/A                              | 4/7 [57] | 3/7 [43] | N/A | -                                                                               |                 |    |     |           |           |     |   |
|                         |         | ΔAZFb                                | 1 AZOY                  | 0/1 [0] TESE                                                  |                         |                |                                              |                                  |          |          |     | -                                                                               |                 |    |     |           |           |     |   |
|                         |         | Partial ΔAZFb<br>(ΔsY143)            | 1 AZOY                  | 1/1 [100]<br>TESE                                             |                         |                |                                              |                                  |          |          |     | Partial ΔAZFb had a<br>biochemical<br>pregnancy, but # ET<br>unknown            |                 |    |     |           |           |     |   |
|                         |         | ΔAZFbc                               | 2 AZOY                  | 0/2 [0] TESE                                                  |                         |                |                                              |                                  |          |          |     | -                                                                               |                 |    |     |           |           |     |   |
|                         |         | ΔAZFc                                | 6 AZOY                  | 6/7 [86]<br>TESE                                              |                         |                |                                              |                                  |          |          |     | All clinical<br>pregnancies occurred<br>for AZFc, but<br>unknown how many<br>ET |                 |    |     |           |           |     |   |
|                         |         | ΔAZFc                                | 6 SOLGY                 | 6/6 [100]<br>ejaculate                                        |                         |                |                                              |                                  |          |          |     | 149 injected<br>oocytes                                                         | 80/149<br>[54]  | 14 | N/A | 5/14 [36] | 3/14 [21] | N/A | - |
|                         |         | -                                    | 23 AZO                  | 15/24 [63]<br>TESE                                            |                         |                |                                              |                                  |          |          |     | 197 injected<br>oocytes                                                         | 104/197<br>[53] | 13 | N/A | 9/13 [69] | N/A       | N/A | - |
| -                       | 30 SOLG | 30/30 [100]<br>ejaculate             | 290 injected<br>oocytes | 181/290<br>[62]                                               | 30                      | N/A            | 15/30 [50]                                   | N/A                              | N/A      | -        |     |                                                                                 |                 |    |     |           |           |     |   |
| de Llanos               | 2005    | ΔAZFc<br>(Δgr/gr)                    | 1 AZOY                  | 0/1 [0]                                                       | -                       | -              | -                                            | -                                | -        | -        | -   | -                                                                               |                 |    |     |           |           |     |   |

|                               |      |                                          |                                                           |                                                   |     |                         |            |                         |           |                                                         |     |                                                                     |
|-------------------------------|------|------------------------------------------|-----------------------------------------------------------|---------------------------------------------------|-----|-------------------------|------------|-------------------------|-----------|---------------------------------------------------------|-----|---------------------------------------------------------------------|
| <i>et al.</i><br>(22)         |      | ΔAZFc (Δgr/gr only)                      | 11 SOLGY (ICSI data only available for four participants) | 11/11 [100]                                       | 73  | 47/73 [64]              | 14/47 [30] | N/A                     | 5/14 [36] | N/A                                                     | N/A | –                                                                   |
| <i>Kihaile et al.</i><br>(23) | 2005 | ΔAZFa (except sY14, sY18, sY78)          | 1 AZOY                                                    | 0/1 [0] TESE                                      | N/A | N/A                     | N/A        | N/A                     | N/A       | N/A                                                     | N/A | –                                                                   |
|                               |      | ΔAZFabc (except sY14, sY18, sY78, sY143) | 1 AZOY                                                    | 0/1 [0] TESE                                      | N/A | N/A                     | N/A        | N/A                     | N/A       | N/A                                                     | N/A | –                                                                   |
|                               |      | ΔAZFc (except sY158, sY159)              | 2 AZOY<br>3 SOLGY                                         | 2/2 [100] AZOY<br>TESE; 3/3 [100] SOLGY ejaculate | 108 | 60.1%±17.9% (mean ± SD) | 8          | 87.6%±14.5% (mean ± SD) | 3/8 [38]  | N/A                                                     | N/A | –                                                                   |
|                               |      | –                                        | 11 Oligozoospermic                                        | N/A                                               | 269 | 71.6%±15.7% (mean ± SD) | 21         | 85.1±9.4 (mean ± SD)    | 9/21 [43] | N/A                                                     | N/A | –                                                                   |
| <i>Stouffs et al.</i><br>(24) | 2005 | ΔAZFa                                    | 1 AZOY                                                    | 0/1 [0] TESE                                      | –   | –                       | –          | –                       | –         | –                                                       | –   | Combined cryptozoospermia (<0.1×10 <sup>6</sup> ) and SOLG together |
|                               |      | ΔAZFb                                    | 2 AZOY; 1 SOLGY                                           | 0/3 [0] TESE                                      | –   | –                       | –          | –                       | –         | –                                                       | –   |                                                                     |
|                               |      | ΔAZFc                                    | 16 AZOY; 11 SOLGY (16 of these attempted 40 ICSI cycles)  | 10/17 [59] TESE                                   | 379 | 209/379 [55]            | 32         | N/A                     | 7/32 [22] | 5 (delivery or ongoing), but 3 babies; what to do here? | –   |                                                                     |
|                               |      | ΔAZFbc                                   | 5 AZOY                                                    | 0/5 [0] TESE                                      | –   | –                       | –          | –                       | –         | –                                                       | –   |                                                                     |



|                             |      |                                                                                                                                                                                                                                            |         |                |     |                                                                                               |     |     |                                                             |                                      |     |                                                  |
|-----------------------------|------|--------------------------------------------------------------------------------------------------------------------------------------------------------------------------------------------------------------------------------------------|---------|----------------|-----|-----------------------------------------------------------------------------------------------|-----|-----|-------------------------------------------------------------|--------------------------------------|-----|--------------------------------------------------|
|                             |      | -                                                                                                                                                                                                                                          | 385 AZO | 188/385 [49]   | N/A | N/A                                                                                           | N/A | N/A | 91/185 [48] (clinical pregnancies/patients sperm retrieved) | N/A                                  | N/A | -                                                |
| Plotton <i>et al.</i> (27)  | 2010 | Partial $\Delta$ AZFb; $\Delta$ sY142, $\Delta$ sY143, $\Delta$ sY1197, $\Delta$ sY1192, $\Delta$ G34984 (PRY); partial $\Delta$ AZFc ( $\Delta$ DAZ1, $\Delta$ DAZ2); deletion of palindrome P3 with extion to u1 region; G1-g3 inversion | 1 OATY  | N/A            | N/A | N/A                                                                                           | N/A | N/A | N/A                                                         | N/A                                  | N/A | Natural pregnancy occurred during investigations |
| Gamber <i>a et al.</i> (28) | 2010 | $\Delta$ AZFc                                                                                                                                                                                                                              | 1 AZOY  | 1/1 [100] TESE | 6   | 3/6 [50] excellent quality (does this mean that it could be >3, but only 3 were "excellent"?) | 3   | N/A | 3/3 [100] *triplets                                         | 3/3 [100] *triplets                  | N/A | -                                                |
| Kilic <i>et al.</i> (29)    | 2010 | $\Delta$ sY127, $\Delta$ sY134 (of AZFb); mosaicism 45X                                                                                                                                                                                    | 1 AZOY  | 1/1 [100] TESE | N/A | N/A                                                                                           | 3   | N/A | 0/3 [0] (assuming all three embryos were transferred)       | 0/3 [0] (assuming all three embryos) | N/A | -                                                |

|                          |      |                                                                                                                                                                                                                                                                                       |                 |                        |                            |     |                                                                              |     |     |                                                                                                                                                    |     |   |
|--------------------------|------|---------------------------------------------------------------------------------------------------------------------------------------------------------------------------------------------------------------------------------------------------------------------------------------|-----------------|------------------------|----------------------------|-----|------------------------------------------------------------------------------|-----|-----|----------------------------------------------------------------------------------------------------------------------------------------------------|-----|---|
|                          |      | (5%)/46XY<br>(95%) by<br>cytogenetic<br>analysis                                                                                                                                                                                                                                      |                 |                        |                            |     |                                                                              |     |     | were<br>transferred)                                                                                                                               |     |   |
|                          |      | ΔsY127,<br>ΔsY134 (of<br>AZFb);<br>ΔsY254,<br>ΔsY255 (of<br>AZFc); 45,X<br>(45%)/ 46XY<br>(55%)<br>mosaicism                                                                                                                                                                          | 1 AZOY          | 0/1 [0] TESE           | N/A                        | N/A | N/A                                                                          | N/A | N/A | N/A                                                                                                                                                | N/A | – |
| Mateu <i>et al.</i> (30) | 2010 | ΔAZFc                                                                                                                                                                                                                                                                                 | 5 SOLGY; 1 AZOY | N/A                    | 13 (median)<br>No. oocytes | 61% | N/A                                                                          | N/A | 60% | 3 No. live<br>births                                                                                                                               | N/A | – |
|                          |      | –                                                                                                                                                                                                                                                                                     | 9 SOLG; 1 AZO   | N/A                    | 11 (median)<br>No. oocytes | 60% | N/A                                                                          | N/A | 67% | 9 No. live<br>births                                                                                                                               | N/A | – |
| Shi <i>et al.</i> (31)   | 2011 | Duplication in<br>Yp11.2 which<br>contains<br><i>AMELY</i> , <i>PRKY</i><br>and <i>TBL1Y</i><br>genes, and<br>five <i>TTYs</i><br>( <i>TTY16</i> ,<br><i>TTY12</i> ,<br><i>TTY18</i> ,<br><i>TTY19</i> and<br><i>TTY11</i> ;<br>ΔsY124,<br>ΔsY127<br>(Partial<br>ΔAZFb);<br>(deletion | 1 OATY          | 2/2 [100]<br>ejaculate | –                          | –   | 2<br>embryos<br>first ICSI<br>cycle; 2<br>embryos<br>second<br>ICSI<br>cycle | –   | –   | 2/2 [100] first<br>ICSI, both<br>preterm but<br>did not survive<br>(immature<br>lung<br>development)<br>[2004]; 2/2<br>[100] second<br>ICSI [2007] | –   | – |



|                        |      |                                                                                                                                                                                                   |                                                            |                                                                      |                                                       |              |    |   |            |            |   |   |
|------------------------|------|---------------------------------------------------------------------------------------------------------------------------------------------------------------------------------------------------|------------------------------------------------------------|----------------------------------------------------------------------|-------------------------------------------------------|--------------|----|---|------------|------------|---|---|
|                        |      | included whole P5, P4 and <i>DYZ19</i> regions); the final karyotype was interpreted as: 46XY, arr cgh; Yp11.2 ( <i>AMELY</i> → <i>TTT Y11</i> ) .2, Yq11.22 ( <i>XKRY</i> → <i>RPS4 Y2</i> ) · 0 |                                                            |                                                                      |                                                       |              |    |   |            |            |   |   |
| Kim <i>et al.</i> (32) | 2012 | ΔAZFa                                                                                                                                                                                             | 5 AZOY                                                     | No sperm successfully collected                                      | –                                                     | –            | –  | – | –          | –          | – | – |
|                        |      | ΔAZFb                                                                                                                                                                                             | 7 AZOY; 1 SOLGY                                            | No sperm successfully collected                                      | –                                                     | –            | –  | – | –          | –          | – | – |
|                        |      | ΔAZFc                                                                                                                                                                                             | 28 AZOY; 26 SOLGY; 1 MOLGY (5–20×10 <sup>6</sup> sperm/mL) | 23 couples attempted ICSI;<br><br>14 pts TESE<br><br>9 pts ejaculate | 18.7±8.5 (mean ± SD) no. retrieved oocytes; 488 total | 318/488 [65] | 33 | – | 13/33 [39] | 13/33 [39] | – | – |
|                        |      | ΔAZFabc                                                                                                                                                                                           | 9 AZOY                                                     | No sperm successfully collected                                      | –                                                     | –            | –  | – | –          | –          | – | – |

|                         |      |        |                                                                                                                                                                                                                            |                                         |                                |                  |     |                  |             |                                                                                                |   |                                                                 |
|-------------------------|------|--------|----------------------------------------------------------------------------------------------------------------------------------------------------------------------------------------------------------------------------|-----------------------------------------|--------------------------------|------------------|-----|------------------|-------------|------------------------------------------------------------------------------------------------|---|-----------------------------------------------------------------|
|                         |      | ΔAZFbc | 24 AZOY                                                                                                                                                                                                                    | No sperm successfully collected         | –                              | –                | –   | –                | –           | –                                                                                              | – | –                                                               |
| Liu <i>et al.</i> (33)  | 2013 | ΔAZFc  | 143 SOLGY (based upon mean sperm concentration); 1.1×10 <sup>6</sup> sperm/cc (mean sperm concentration); 124/143 [87] patients had karyotype tested; n (115/143 tested pts had 46XY [80]); (9/143 [6] abnormal karyotype) | Ejaculate                               | 1,834; 15.71±8.644 (mean ± SD) | 1,133/1,834 [62] | 110 | 1203/1280 [94]   | 36/110 [33] | 29/110 [26] delivery rate (birth of liveborn or stillborn)                                     | 0 | Some of the patients have abnormal karyotype (inversions, etc.) |
|                         |      | –      | 143 MOLG (based upon mean sperm concentration); 10.55 ×10 <sup>6</sup> sperm/cc                                                                                                                                            | Ejaculate                               | 1,700; 15.70±8.441 (mean ± SD) | 1,153/1,700 [68] | 117 | 1,144/1,299 [88] | 39/117 [33] | 30/117 [26] delivery rate (birth of liveborn or stillborn)                                     | 0 | –                                                               |
| Choi <i>et al.</i> (34) | 2013 | ΔAZFbc | 25 AZOY; 4 OATY                                                                                                                                                                                                            | 0/9 [0] AZOY TESE; N/A OATY ejaculate   | N/A                            | –                | –   | –                | –           | 2/3 [67] OATY (patient/patient attempted ICSI); 0/17 [0] AZOY (patient/patient attempted ICSI) | – | –                                                               |
|                         |      | ΔAZFc  | 58 AZOY; 23 OATY                                                                                                                                                                                                           | 8/21 [38] AZOY TESE; N/A OATY ejaculate | N/A                            | N/A              | N/A | N/A              | N/A         | 8/46 [17] AZOY (patient/patient attempted                                                      | – | –                                                               |

|                        |      |                                 |                                             |                          |     |              |                              |              |                         |                                                         |     |                                               |  |
|------------------------|------|---------------------------------|---------------------------------------------|--------------------------|-----|--------------|------------------------------|--------------|-------------------------|---------------------------------------------------------|-----|-----------------------------------------------|--|
|                        |      |                                 |                                             |                          |     |              |                              |              |                         | ICSI); 9/16 [56]<br>OATY                                |     |                                               |  |
|                        |      | –                               | 130 AZO                                     | 21/82 [26]<br>AZO; N/A   | N/A | N/A          | N/A                          | N/A          | N/A                     | 23/138 [17]                                             | N/A | –                                             |  |
|                        |      | –                               | 49 OAT                                      | OAT<br>ejaculate         | N/A | N/A          | N/A                          | N/A          | N/A                     | total<br>patients/patients<br>attempted<br>ICSI         | N/A | –                                             |  |
| Sen <i>et al.</i> (35) | 2015 | gr/gr                           | 18 AZOY; 33 (S)OLGY                         | N/A                      | N/A | N/A [77]     | 28                           | N/A          | 3/10 [30] men; not ET   | N/A                                                     | N/A | 10 men attempted ICSI                         |  |
|                        |      | b1/b3                           | 1 AZOY; 2 (S)OLGY                           |                          |     |              |                              |              |                         |                                                         |     |                                               |  |
|                        |      | b2/b3                           | 1 AZOY; 1 (S)OLGY                           |                          |     |              |                              |              |                         |                                                         |     |                                               |  |
|                        |      | gr/gr                           | 8 control                                   | N/A                      | N/A | N/A [78]     | 734                          | N/A          | 59/230 [26] men; NOT ET | N/A                                                     | N/A | ET done in 230 men, though 239 attempted ICSI |  |
|                        |      | b1/b3                           | 2 control                                   |                          |     |              |                              |              |                         |                                                         |     |                                               |  |
|                        |      | b2/b3                           | 6 control                                   |                          |     |              |                              |              |                         |                                                         |     |                                               |  |
| Zhu <i>et al.</i> (36) | 2015 | Location of deletion not stated | 27 AZOY                                     | 14/27 [52]<br>TESE       | 228 | 154/228 [68] | 14;<br>2.21±0.43 (mean ± SD) | 137/154 [89] | 7/14 [50]               | 5/7 [71] (2/7 miscarriage rate; 2/7 multiple rate)      | –   | –                                             |  |
|                        |      | Location of deletion not stated | 43 (S)OLGY (sperm concentration not stated) | 43/43 [100]<br>ejaculate | 670 | 468/670 [70] | 43;<br>2.19±0.39 (mean ± SD) | 420/468 [89] | 25/43 [58]              | 20/25 [80] (5/25 miscarriage rate; 6/25 multiple rate)  | N/A | –                                             |  |
|                        |      | –                               | 28 AZO                                      | N/A                      | 408 | 307/408 [74] | 28;<br>2.18±0.39 (mean ± SD) | 291/307 [95] | 16/28 [57]              | 12/16 [75] (4/16 miscarriage rate; 2/16 multiple rates) | N/A | –                                             |  |

|                        |      |                |                                            |                                                                                                     |                        |                                          |                           |              |            |                                                                                                                    |     |                                                                                   |
|------------------------|------|----------------|--------------------------------------------|-----------------------------------------------------------------------------------------------------|------------------------|------------------------------------------|---------------------------|--------------|------------|--------------------------------------------------------------------------------------------------------------------|-----|-----------------------------------------------------------------------------------|
|                        |      | –              | 86 (S)OLG (sperm concentration not stated) | N/A                                                                                                 | 1,263                  | 958/1,263 [76]                           | 86; 2.15±0.36 (mean ± SD) | 903/958 [94] | 51/86 [59] | 45/51 [88] (6/51 miscarriage rate; 14/51 multiple rate)                                                            | N/A | –                                                                                 |
| Zhu <i>et al.</i> (37) | 2015 | ΔAZFc (ΔsY152) | 3 AZOY; 3 SOLGY; 6 MOLGY                   | Inclusion criteria required successfully obtained sperm by TESE or masturbation; total attempts N/A | 11.50±5.71 (mean ± SD) | 171/250 [68]                             | 26; 2.38±0.57 (mean ± SD) | 155/171 [91] | 12/26 [46] | 11/26 [42] delivery rate per transfer; 3/12 [25] multiple rate; 2/11 [18] preterm rate; 1/12 [8] miscarriage rate  | N/A | Exclusion criteria: complete fertilization failure in the previous ICSI treatment |
|                        |      | ΔAZFc          | 31 AZOY; 14 SOLGY<br>4                     | Inclusion criteria required successfully obtained sperm by TESE or masturbation; total attempts N/A | 11.90±6.67 (mean ± SD) | 582/824 [71]                             | 70; 2.29±0.46 (mean ± SD) | 532/582 [91] | 38/70 [54] | 31/70 [44] delivery rate per transfer; 8/38 [21] multiple rate; 5/32 [16] preterm rate; 7/38 [18] miscarriage rate | N/A | –                                                                                 |
|                        |      | –              | 21 AZO; 15 SOLG; 14 MOLGY                  | Inclusion criteria required successfully obtained sperm by TESE or masturbation                     | 11.67±7.11 (mean ± SD) | 636/849 [75] (/total # oocytes injected) | 73; 2.42±0.50 (mean ± SD) | 599/636 [94] | 40/73 [55] | 34/73 [47] delivery rate per transfer; 10/40 [25] multiple rate; 7/34 [21] preterm rate; 6/40 [15]                 | N/A | –                                                                                 |

|                                     |      |                                                                          |        | n; total attempts<br>N/A                                                |                                                   |               |     |     |                                                                                             | miscarriage rate |     |   |
|-------------------------------------|------|--------------------------------------------------------------------------|--------|-------------------------------------------------------------------------|---------------------------------------------------|---------------|-----|-----|---------------------------------------------------------------------------------------------|------------------|-----|---|
| Ko <i>et al.</i><br>(38)            | 2016 | ΔAZFbc;<br>(46XY/45X<br>(33:1) and<br>45X/46X, idic(Y<br>(q11.2) (12:18) | 2 AZOY | 0/2 [0] TESE<br>or mTESE                                                | N/A                                               | N/A           | N/A | N/A | N/A                                                                                         | N/A              | N/A | – |
|                                     |      | ΔAZFabc;<br>46X, der(Y). ish<br>i(Y)(p10)(pter+<br>+, SRY++)             | 1 AZOY | 0/1 [0] TESE<br>or mTESE                                                | N/A                                               | N/A           | N/A | N/A | N/A                                                                                         | N/A              | N/A | – |
|                                     |      | ΔAZFc                                                                    | 6 AZOY | 3/6 [50]<br>TESE or<br>mTESE                                            | 40                                                | 11/40<br>[28] | N/A | N/A | N/A                                                                                         | N/A              | N/A | – |
|                                     |      | –                                                                        | 61 AZO | 28/61 [46]<br>TESE                                                      | N/A                                               | N/A           | N/A | N/A | N/A                                                                                         | N/A              | N/A | – |
| Schwarz<br>er <i>et al.</i><br>(11) | 2016 | ΔAZFb                                                                    | 1      | 0/1 [0] TESE<br>(multilocular<br>or micro-<br>TESE, type<br>not stated) | N/A                                               | N/A           | N/A | N/A | N/A                                                                                         | N/A              | N/A | – |
|                                     |      | ΔAZFbc                                                                   | 2      | 0/2 [0] TESE<br>(multilocular<br>or micro-<br>TESE, type<br>not stated) | N/A                                               | N/A           | N/A | N/A | N/A                                                                                         | N/A              | N/A | – |
|                                     |      | ΔAZFc                                                                    | 20     | 10/20 [50];<br>2/8 [25]<br>multilocular<br>TESE; 8/12                   | Unknown,<br>but 2.3<br>cycles mean<br>carried out | N/A           | N/A | N/A | 2/6 [33] patients attempted<br>ICSI (not specified if clinical<br>or biochemical pregnancy) | 1/2 [50]         | N/A | – |

|                              |      |                                        |          |                                                            |                             |              |     |              |            |            |     |     |   |
|------------------------------|------|----------------------------------------|----------|------------------------------------------------------------|-----------------------------|--------------|-----|--------------|------------|------------|-----|-----|---|
|                              |      |                                        |          | [67] micro-TESE                                            | for 6 of the 10 couples     |              |     |              |            |            |     |     |   |
|                              |      | ΔAZFc + other chromosomal disorder     | 2        | 0/2 [0] TESE (multilocular or micro-TESE, type not stated) | N/A                         | N/A          | N/A | N/A          | N/A        | N/A        | N/A | N/A | - |
| Liu <i>et al.</i> (39)       | 2017 | ΔAZFb (ΔsY127, ΔsY134, ΔsY143)         | 1 MOLGY  | 1/1 [100] ejaculate                                        | 200; 10.19±8.57 (mean ± SD) | 104/200 [52] | 25  | 95/104 [91]  | 6/25 [24]  | 6/24 [25]  | 0   | -   |   |
|                              |      | ΔAZFc (ΔsY152)                         | 1 MOLGY  | 1/1 [100] ejaculate                                        |                             |              |     |              |            |            |     | -   |   |
|                              |      | ΔAZFc (ΔsY152, ΔsY254, ΔsY255, ΔsY157) | 2 MOLGY  | 2/2 [100] ejaculate                                        |                             |              |     |              |            |            |     |     | - |
|                              |      | ΔAZFc (ΔsY152, ΔsY254, ΔsY255)         | 12 MOLGY | 12/12 [100] ejaculate                                      |                             |              |     |              |            |            |     |     | - |
|                              |      | -                                      | 26 MOLG  | N/A                                                        | 336; 12.23±6.56 (mean ± SD) | 278/336 [83] | 30  | 241/278 [87] | 13/30 [43] | 13/53 [25] | 0   | -   |   |
| Goncalves <i>et al.</i> (40) | 2017 | ΔAZFa                                  | N/A      | N/A                                                        | 71                          | 46/71 [65]   | 35  | 44/46 [96]   | 1/35 [3]   | 1/35 [3]   | 0   | -   |   |
|                              |      | ΔAZFb (some partial, some complete)    | -        | N/A                                                        | 55                          | 30/55 [55]   | 19  | 26/30 [87]   | 2/19 [11]  | 0/19 [0]   | 0   | -   |   |



oligoasthenoteratozoospermic without a YCM; <sup>¶¶</sup>, percentage of the total number of metaphase II oocytes injected; <sup>†††</sup>, percentage of the total number of embryos; <sup>‡‡‡</sup>, defined as the ratio of clinical pregnancies and number of ETs; <sup>a</sup>, total of 14 patients, but 2 patients went through 2 cycles each; <sup>b</sup>, Including two cycles with an ongoing pregnancy, but with unknown outcome at the closing date of data collection. ICSI, intracytoplasmic sperm injection; FR, fertilization rate; YCM, Y chromosome microdeletion; AZF, azoospermic factor; ICSI, intracytoplasmic sperm injection; microTESE, microdissection testicular sperm extraction; ET, embryo transfer.
